# Supplementary material
Source: publisher figshare collection journal article supplement (https://acs.figshare.com/ndownloader/files/3615261)
Supplement: Supplementary file 1 [file 3615261]

# **FITC-Conjugated Cyclic RGD Peptides as Fluorescent Probes for Staining Integrin $\alpha_v\beta_3/\alpha_v\beta_5$ in Tumor Tissues**

Yumin Zheng<sup>1,2</sup>, Shundong Ji<sup>1</sup>, Andrzej Czerwinski<sup>3</sup>, Francisco Valenzuela<sup>3</sup>, Michael Pennington<sup>3</sup>, and  
Shuang Liu<sup>1\*</sup>

<sup>1</sup>Department of Nuclear Medicine, China-Japan Friendship Hospital, Beijing, 100029, China

<sup>2</sup>School of Health Sciences, Purdue University, IN 47907, USA

<sup>3</sup>Peptides International, Inc., Louisville, KY 40299, USA

RUNNING TITLE: FITC-Labeled Dimeric Cyclic RGD Peptides as Fluorescent Probes

---

\*Correspondence should be addressed to:

Dr. Shuang Liu  
School of Health Sciences  
Purdue University  
550 Stadium Mall Drive  
West Lafayette, IN 47907  
Phone: 765-494-0236  
Fax 765-496-1377  
Email: [liu100@purdue.edu](mailto:liu100@purdue.edu)

## Protocols for Cellular Staining

**Cellular Staining of Acetone-Fixed Cells.** Tumor cells (U87MG, MDA-MB-435, A549, HT29 and PC-3) were cultured in Lab-Tek 8-well glass chamber slides (BD, Bedford, MA) for >24 h before being used for cellular staining studies. The tumor cells were fixed with -20 °C pre-cold acetone for 15 min. The cells were incubated with 1% BSA in 0.01 M phosphate buffer solution (PBS, pH 7.4) for 30 min at room temperature to block non-specific binding. In overlay experiments, tumor cells were incubated for 1 h at room temperature with 10  $\mu$ M FITC-conjugated RGD peptides (FITC-RGD<sub>2</sub>, FITC-3P-RGD<sub>2</sub> or FITC-Galacto-RGD<sub>2</sub>) and anti-human integrin  $\alpha_v\beta_3$  antibody (sc-7312, 2.0  $\mu$ g/mL, BD Biosciences, San Jose, CA). After washing with PBS three times, the tumor cells were incubated with Cy3-conjugated goat anti-mouse antibodies (1:100, V/V, Jackson Immuno-Research Inc., West Grove, PA) for another hour at room temperature. After washing with PBS buffer, the slides were mounted with Dapi Fluormount G (SouthernBiotech, Birmingham, AL) and cover glass. Fluorescence was visualized with an Olympic BX51 fluorescence microscope (Olympus America Inc., Center Valley, PA). Images were acquired using a Hamamatsu digital CCD camera ORCA-R2 (Hamamatsu Photonics K.K., Japan) with Olympus MetaMorph software. All pictures were taken under 400  $\times$  magnifications with the same exposure time. Brightness and contrast adjustments were made equally to all images. The overlays were made using Olympus MetaMorph software.

**Cellular Staining of Living Cells.** Tumor cells (U87MG, MDA-MB-435, A549, HT29 and PC-3) were rinsed with ice-cold PBS for 5 min, and then incubated with 1% BSA in PBS for 30 min on ice to block non-specific binding. Tumor cells were incubated with 10  $\mu$ M FITC-labeled cyclic RGD peptides (FITC-RGD<sub>2</sub>, FITC-3P-RGD<sub>2</sub> or FITC-Galacto-RGD<sub>2</sub>) for 2 h on ice. After washing with PBS buffer, tumor cells were analyzed for fluorescent intensity. In overlay experiments, tumor cells were incubated with 1% BSA in PBS for 30 min on ice, and then incubated for 2 h on ice with 10  $\mu$ M FITC-conjugated cyclic RGD peptide and anti-human integrin  $\alpha_v\beta_3$  antibody (sc-7312: 2.0  $\mu$ g/mL). After washing with PBS buffer, tumor cells were then incubated for another 1 h on ice with Cy3-conjugated goat anti-mouse antibodies (1:100, V/V). In the blocking experiments, U87MG glioma cells were incubated for 2 h with 10  $\mu$ M FITC-Galacto-RGD<sub>2</sub> in the presence of 1 mM c(RGDfK)<sub>2</sub>. FITC-3P-RGK<sub>2</sub> (10  $\mu$ M) was used as negative control to demonstrate RGD specificity of cyclic RGD peptides for integrin  $\alpha_v\beta_3$ .

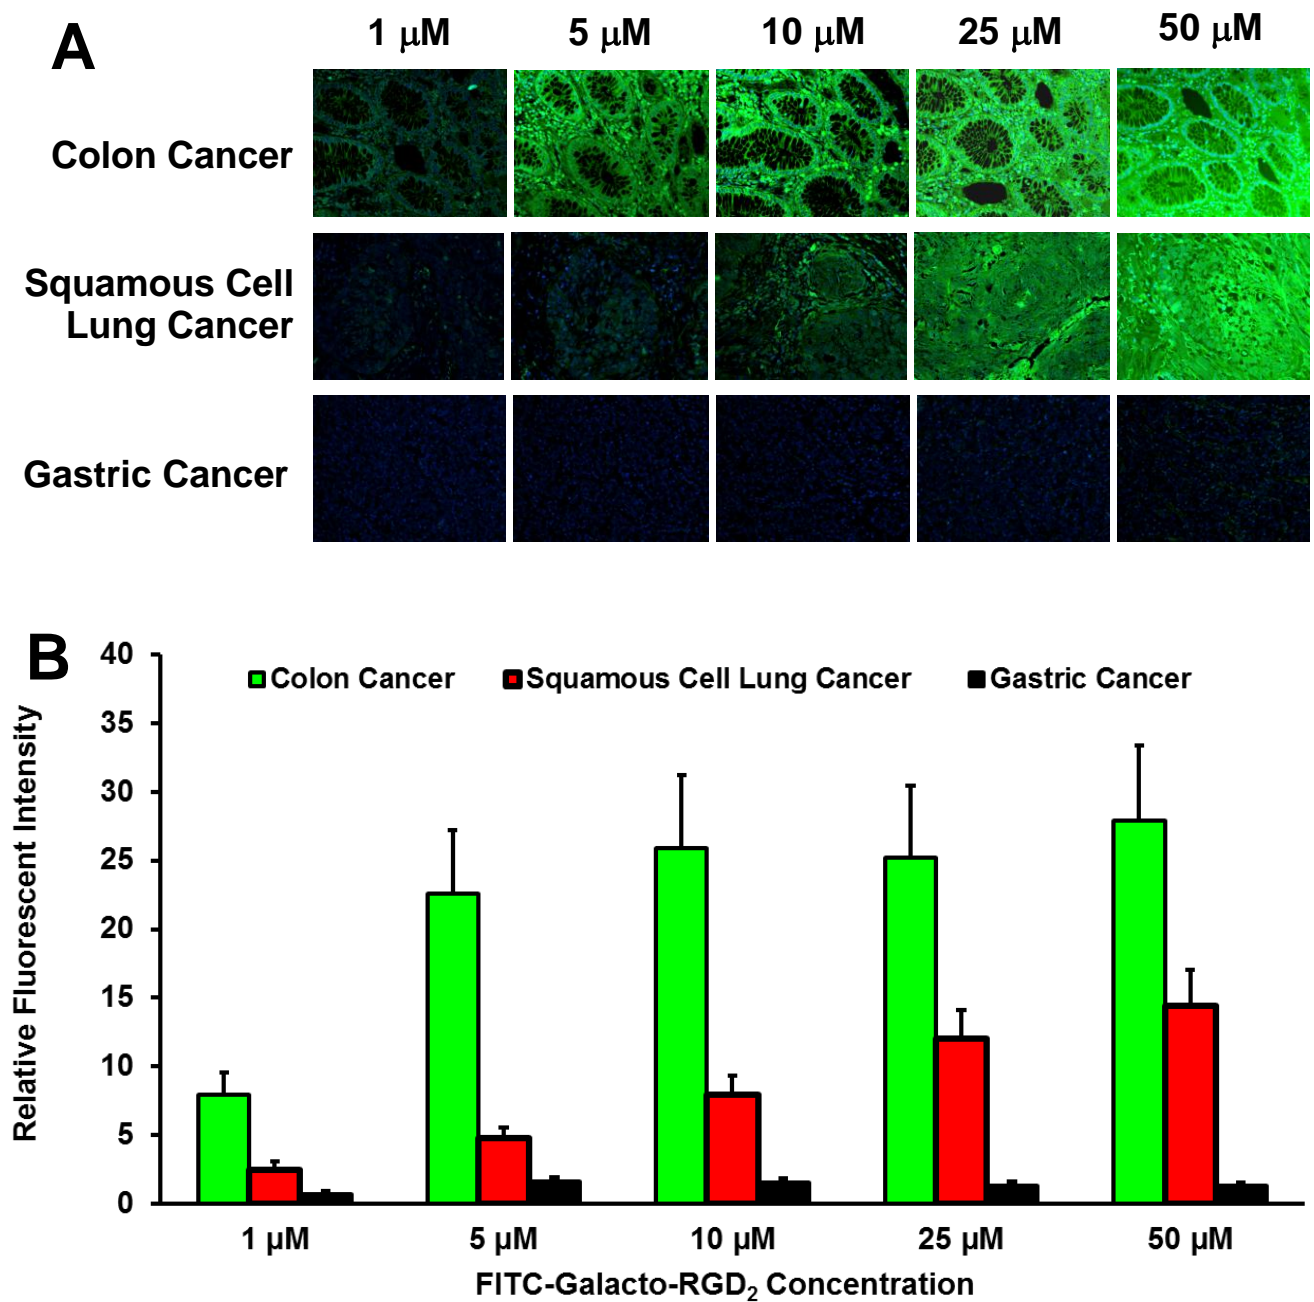

Figure S11. **A**: Selected microscopic images (Magnification: 200  $\times$ ) of colon cancer, squamous cell lung cancer and gastric cancer tissues stained with FITC-Galacto-RGD<sub>2</sub> (1, 5, 10, 25 and 50  $\mu$ M). **B**: Quantification of fluorescence intensity on tumor slices to illustrate the concentration-dependence of tumor fluorescence intensity. The relative integrin  $\alpha_v\beta_3/\alpha_v\beta_5$  density was quantified as the percentage of the area positively stained with FITC-Galacto-RGD<sub>2</sub> over the total area of each image.

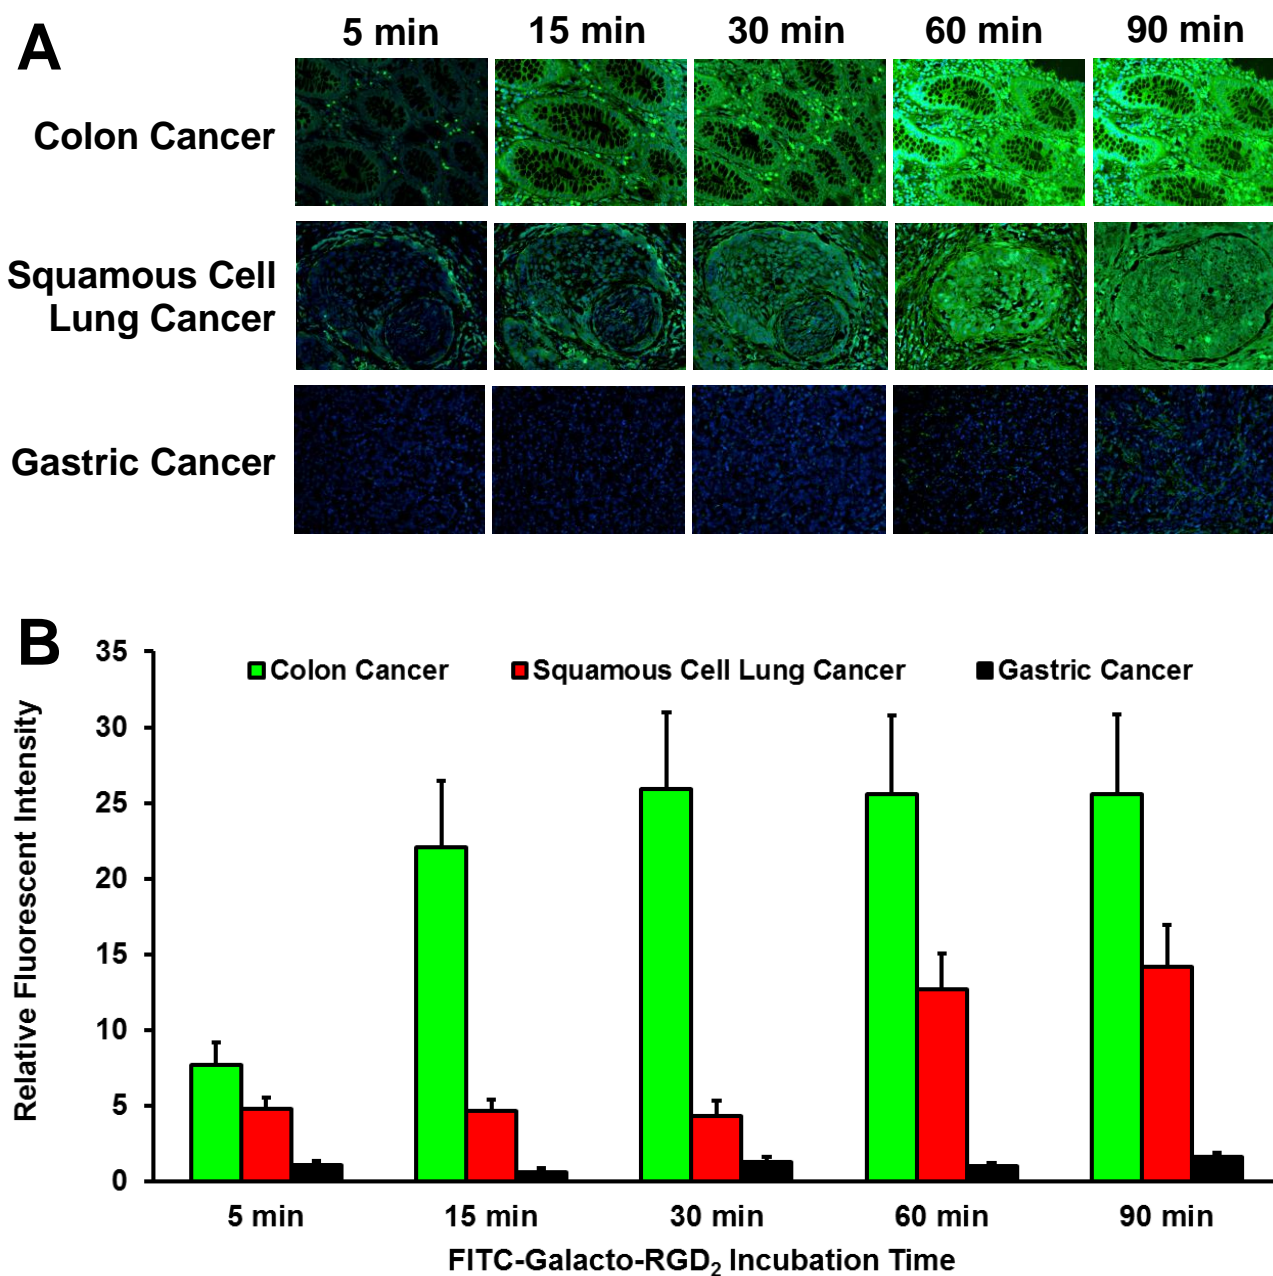

Figure SI2. A: Microscopic images (Magnification: 200×) of colon cancer, lung squamous cell cancer and gastric cancer tissues stained with 50  $\mu$ M FITC-Galacto-RGD<sub>2</sub>. B: The tumor tissue staining kinetics as illustrated by the fluorescence intensity at different incubation times (5 – 90 min) to illustrate the dependence of tumor fluorescence intensity on incubation time. The relative integrin  $\alpha_v\beta_3/\alpha_v\beta_5$  density was quantified as the percentage of the area positively stained with FITC-Galacto-RGD<sub>2</sub> over the total area of each image.

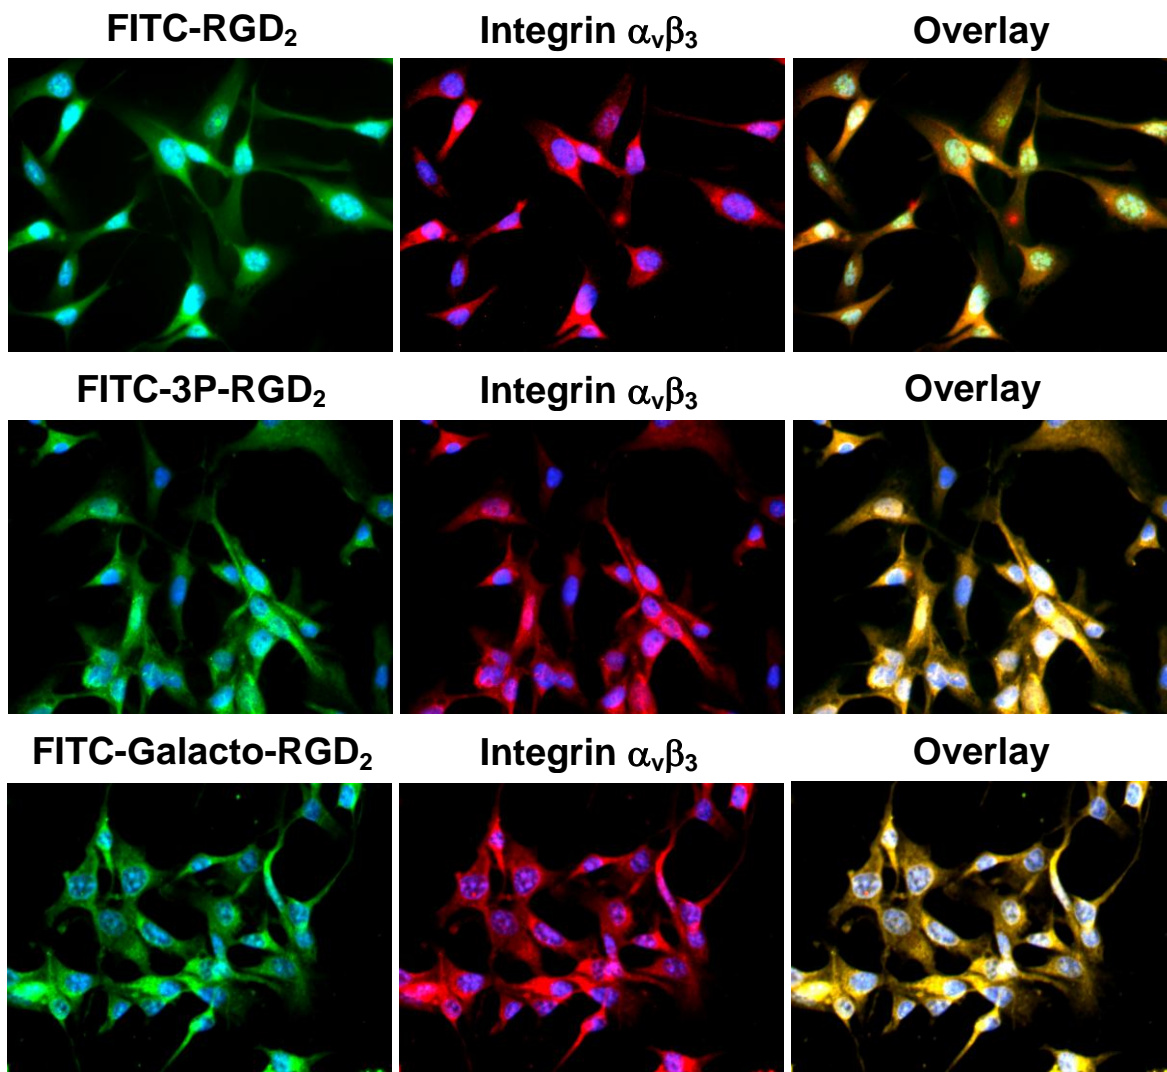

Figure SI3. Selected microscopic images (Magnification: 400 $\times$ ) of U87MG glioma cells stained with FITC-conjugated cyclic RGD peptides (Green) and mouse anti-human integrin  $\alpha_v\beta_3$  antibody (sc-7312) detected with Cy3 conjugated goat anti-mouse antibody (red). Blue color indicates the presence of nuclei stained with DAPI. In the overlay images, orange and yellow colors indicate co-localization of FITC-labeled cyclic RGD peptides (Top: FITC-RGD<sub>2</sub>; Middle: FITC-3P-RGD<sub>2</sub>; Bottom: FITC-Galacto-RGD<sub>2</sub>) with sc-7312. Co-incubation of FITC-RGD<sub>2</sub>, FITC-3P-RGD<sub>2</sub> or FITC-Galacto-RGD<sub>2</sub> with anti-integrin  $\alpha_v\beta_3$  antibody resulted in positive staining of U87MG glioma cells. The fluorescence intensity on tumor cells stained with FITC-RGD<sub>2</sub> was slightly lower than that stained with FITC-3P-RGD<sub>2</sub> and FITC-Galacto-RGD<sub>2</sub>, due to its lower integrin  $\alpha_v\beta_3/\alpha_v\beta_5$  binding affinity. The fluorescence signals distributed throughout the entire U87MG tumor cells. Nuclear localization was also observed for FITC-RGD<sub>2</sub>, FITC-3P-RGD<sub>2</sub> and FITC-Galacto-RGD<sub>2</sub>. The orange and yellow colors in the overlay images clearly indicated the co-localization of FITC-conjugated cyclic RGD peptides and anti-integrin  $\alpha_v\beta_3$  antibody. FITC-3P-RGD<sub>2</sub> and FITC-Galacto-RGD<sub>2</sub> were useful as fluorescent probes for integrin  $\alpha_v\beta_3/\alpha_v\beta_5$  staining of U87MG cells.



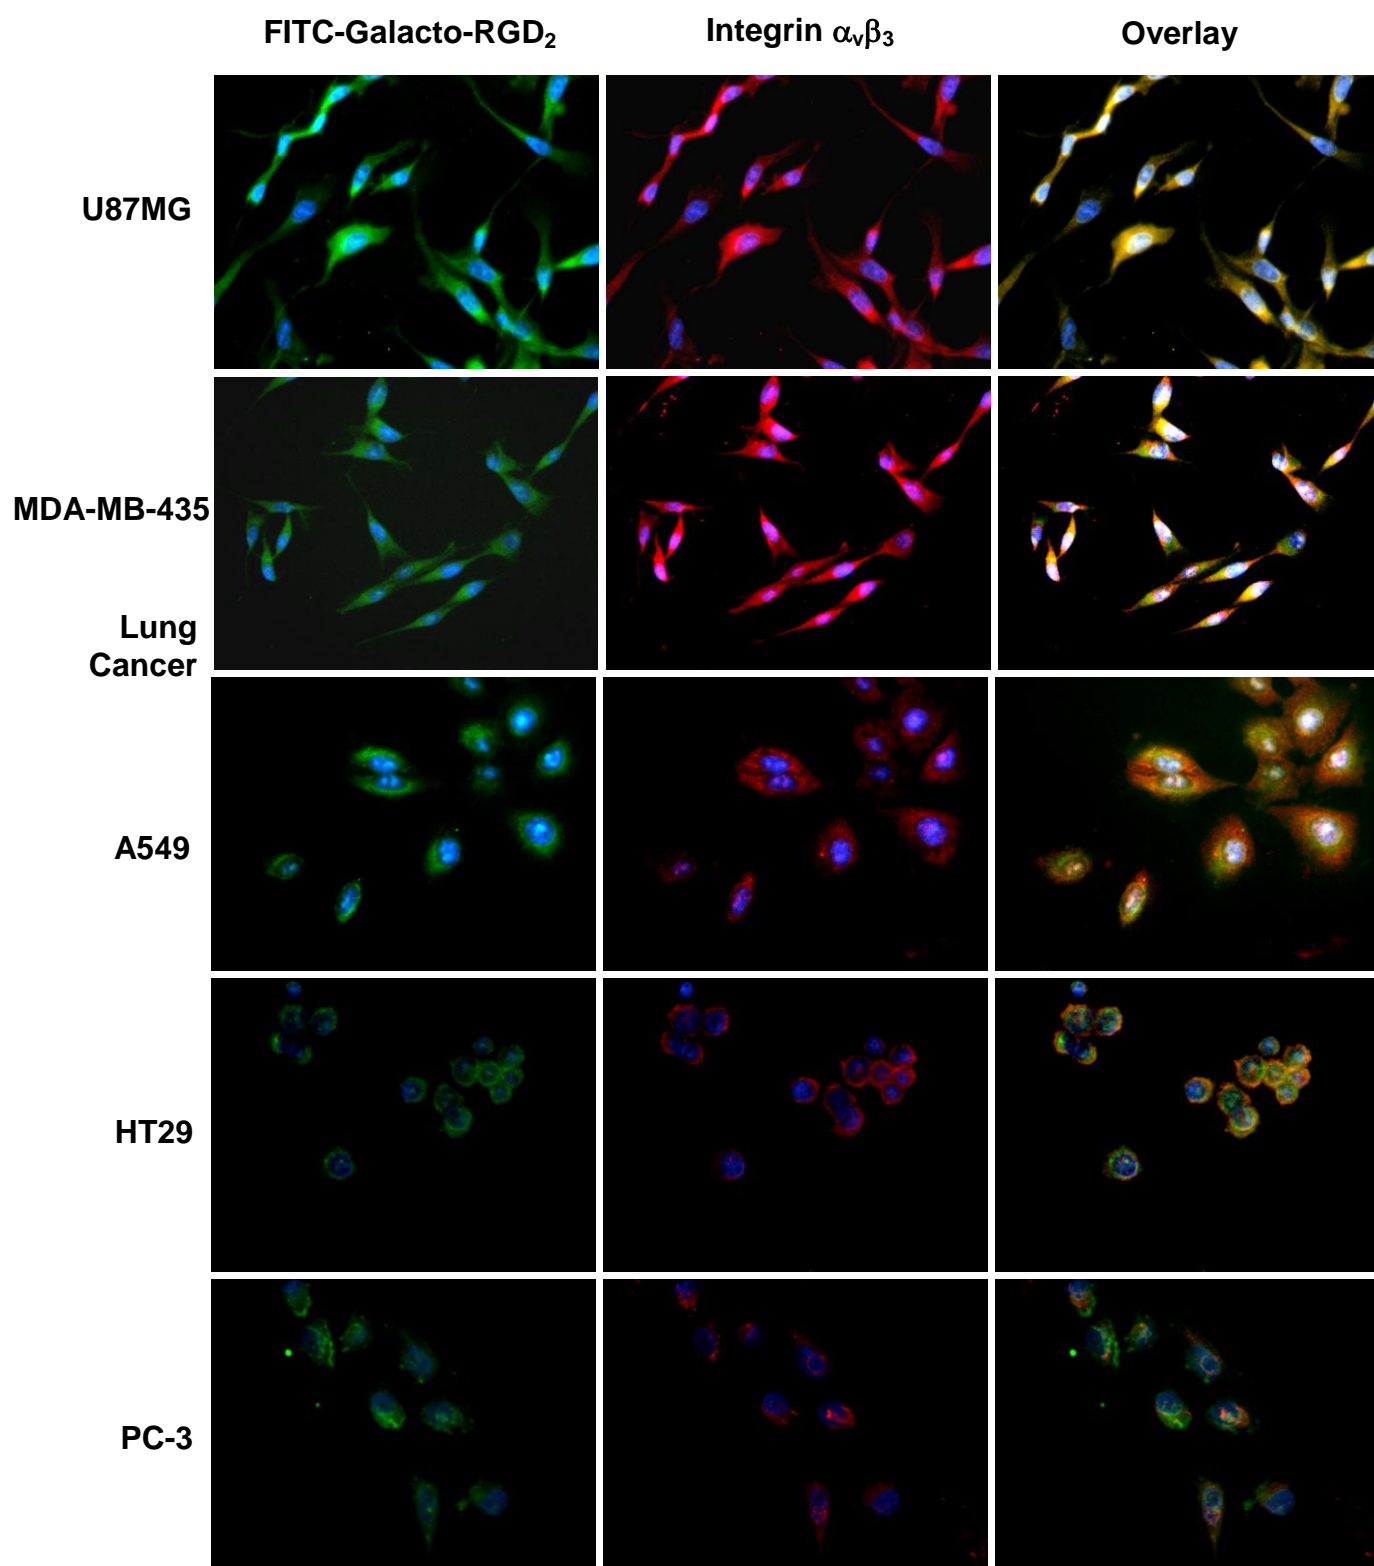

Figure SI4. Microscopic images (Magnification: 400×) of acetone-fixed human cancer cells stained with FITC-Galacto-RGD<sub>2</sub> (green) and mouse anti-human  $\alpha_v\beta_3$  monoclonal antibody (sc-7312) detected with Cy3-conjugated goat anti-mouse antibody (red). Blue color indicates the nuclei stained with DAPI. Orange or yellow in overlay image indicates co-localization of FITC-Galacto-RGD<sub>2</sub> (green) and anti-human integrin  $\alpha_v\beta_3$  monoclonal antibody (sc-7312).

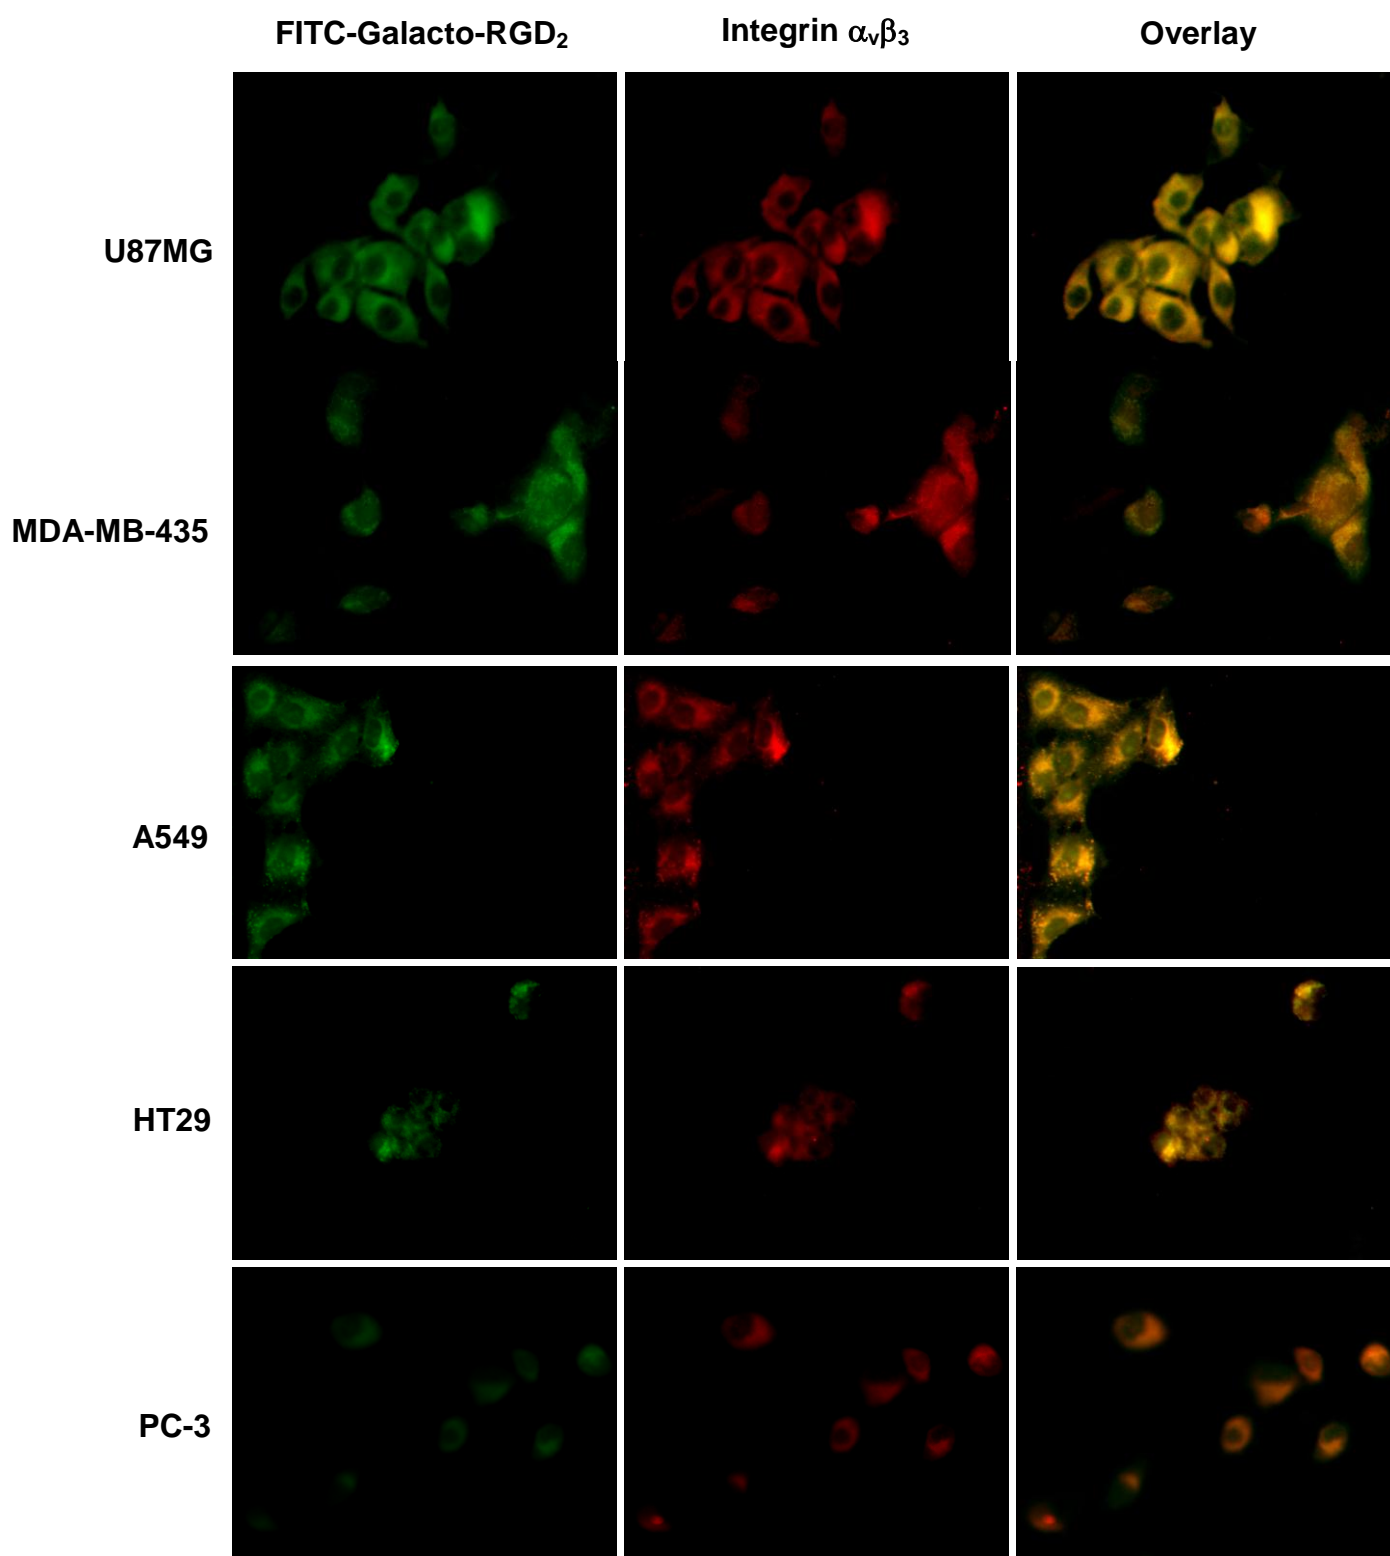

Figure SI5. Microscopic images (Magnification: 400 $\times$ ) of living tumor cells stained with FITC-Galacto-RGD<sub>2</sub> (green) and mouse anti-human  $\alpha_v\beta_3$  monoclonal antibody (sc-7312) detected with Cy3-conjugated goat anti-mouse antibody (red). Orange and yellow in overlay images indicate co-localization of FITC-Galacto-RGD<sub>2</sub> (green) and anti-human  $\alpha_v\beta_3$  monoclonal antibody (sc-7312) in living tumor cells.
